# Supplementary material for: De Novo Transcriptomic Analysis of an Oleaginous Microalga: Pathway Description and Gene Discovery for Production of Next-Generation Biofuels
Source: PLOS journal article supplement (doi:10.1371/journal.pone.0035142), 2012-04-20
Supplement: S1 (10.1371/journal.pone.0035142.s001) [file journal.pone.0035142.s001]

**Table S1** Enzymes involved in Calvin cycle identified by annotation of the *E.* cf. *polyphem* transcriptome.

| Enzyme | Symbol | EC Number | Number of transcripts |
| --- | --- | --- | --- |
| Ribulose-bisphosphate carboxylase large chain | RBCL | 4.1.1.39 | 5 |
| Phosphoglycerate kinase | PGK | 2.7.2.3 | 6 |
| Glyceraldehyde-3-phosphate dehydrogenase (NADP+) | GAPA | 1.2.1.13 | 1 |
| Glyceraldehyde-3-phosphate dehydrogenase (NAD(P)) | GAP2 | 1.2.1.59 | 1 |
| Transketolase | TRK | 2.2.1.1 | 4 |
| Triosephosphate isomerase | TPI | 5.3.1.1 | 2 |
| Fructose-bisphosphate aldolase | ALDO | 4.1.2.13 | 3 |
| Fructose-1,6-bisphosphatase I | FBP | 3.1.3.11 | 8 |
| Sedoheptulose-1,7-bisphosphatase | SEBP | 3.1.3.37 | 4 |
| Ribose 5-phosphate isomerase A | RPIA | 5.3.1.6 | 2 |
| Phosphoribulokinase | PRKB | 2.7.1.19 | 1 |
| Ribulose-phosphate 3-epimerase | RPE | 5.1.3.1 | 1 |
| Phosphoketolase |  | 4.1.2.9 | 0 |
