# Supplementary material for: De Novo Transcriptomic Analysis of an Oleaginous Microalga: Pathway Description and Gene Discovery for Production of Next-Generation Biofuels
Source: PLOS journal article supplement (doi:10.1371/journal.pone.0035142), 2012-04-20
Supplement: S3 (10.1371/journal.pone.0035142.s003) [file journal.pone.0035142.s003]

**Table S3** Enzymes involved in pentose phosphate pathway identified by annotation of the *E.* cf. *polyphem* transcriptome.

| Enzyme | Symbol | EC Number | Number of transcripts |
| --- | --- | --- | --- |
| Glucose-6-phosphate dehydrogenase | G6PD | 1.1.1.49 | 1 |
| Gluconolactonase |  | 3.1.1.17 | 1 |
| 6-phosphogluconate dehydrogenase | PGD | 1.1.1.44 | 2 |
| Transketolase | TRK | 2.2.1.1 | 4 |
| Transaldolase | TAL | 2.2.1.2 | 1 |
